# Supplementary material for: Streptococcus sobrinus as a Predominant Oral Bacteria Related to the Occurrence of Dental Caries in Polish Children at 12 Years Old
Source: MDPI journal article supplement (doi:10.3390/ijerph192215005), 2022-11-15
Supplement: s1 [file s1]

Table S1. Sequence of primers used in real-time PCR.

| Species                                                                              | Sequence (5'-3')                                             | Product size<br>(16S rRNA) | reference |
|--------------------------------------------------------------------------------------|--------------------------------------------------------------|----------------------------|-----------|
| <i>Streptococcus mutans</i><br>Forward primer<br>Reverse primer                      | GCAGTCAAGGGGTGGAAATCG<br>TGGACGGCTTGTTGCAGGAATAC             | 188 bp                     | 14        |
| <i>Streptococcus sobrinus</i><br>Forward primer<br>Reverse primer                    | AAAACATTGGGTTACGATTGCG<br>CGTCATTGGTAGTAGCCTGA               | 156 bp                     | 14        |
| <i>Lactobacillus acidophilus</i><br>Forward primer<br>Reverse primer                 | GAAAGAGCCCAAACCAAGTGATT<br>CTCCCAGATAATTCAACTATCGCTTA        | 85 bp                      | 15        |
| <i>Lactobacillus fermentum</i><br>Forward primer<br>Reverse primer                   | TGGAAACAGRTGCTAATACCG<br>GTCCATTGTGGAAGATTCCC                | 231 bp                     | 16        |
| <i>Aggregatibacter<br/>actinomycetemcomitans</i><br>Forward primer<br>Reverse primer | GAACCTTACCTACTCTTGACATCCGAA<br>TGCAGCACCTGTCTCAAAGC          | 80 bp                      | 17        |
| <i>Fusobacterium nucleatum</i><br>Forward primer<br>Reverse primer                   | GGATTTATTGGGCGTAAAGC<br>GGCATTCTACAAATATCTACGAA              | 163 bp                     | 17        |
| <i>Prevotella pallens</i><br>Forward primer<br>Reverse primer                        | AACGAATGAATGTCCGCGATAATGAAGTC<br>CGAGAAAGACCACCTGGACCTAAAGCA | 190 bp                     | 18        |
| <i>Veillonella parvula</i><br>Forward primer<br>Reverse primer                       | GAACGTTTGTGCGTGCTATTTTTGGT<br>TCGTCGCCATTTTCACGGGTAA         | 128 bp                     | 18        |
